# Supplementary material
Source: publisher site journal article supplement (https://www.dovepress.com/article/301655)
Supplement: Supplementary file 1 [file 301655-Revised-Table-S1.pdf › 301655-Revised-Table-S1.pdf]

**Table S1. Qualitative fieldnotes of sensory abnormality self-reported with QST parameters.**

Note: a1, ipsilateral area; a2, contralateral area; a3, target area; CDT, cold detection threshold; CPT, cold pain threshold; DMA, dynamic mechanical allodynia; HDT, heat detection threshold; HPT, heat pain threshold; MDT, mechanical detection threshold; NA, not applicable; On, the spinal cord stimulator was activated; Off, the spinal cord stimulator was deactivated; PPT, pressure pain threshold; TSP, mechanical temporal summation of pain; VDT, vibration detection threshold.

| <b>Allodynia</b>             |                                                                         |                                                                                                |
|------------------------------|-------------------------------------------------------------------------|------------------------------------------------------------------------------------------------|
|                              | <b>Fieldnote</b>                                                        | <b>Patient ID (neurostimulator status: area tested)</b>                                        |
| <b>CDT</b>                   | When the cold sensation appeared, the patient felt a painful sensation. | 05(Off:a2a3, On:a2), 08(Off:a2), 18(On:a2a3), 27(On:a3)                                        |
|                              | The patient was in too much pain to complete the test.                  | 08 (On:a3)                                                                                     |
| <b>CPT (unpainful phase)</b> | Not applicable                                                          |                                                                                                |
| <b>HDT</b>                   | The patient felt a painful sensation added to the heat sensation.       | 03 (Off:a2a3), 05(Off:a3, On:a3), 28(Off:a3), 10(Off/On:a3), 18(On:a2a3),                      |
|                              | The patient felt a painful sensation during the stimulation.            | 35(On/Off:a3)                                                                                  |
|                              | The patient was in too much pain to complete the test.                  | 44(Off:a2a3)                                                                                   |
| <b>HPT (unpainful phase)</b> | Not applicable                                                          |                                                                                                |
| <b>MDT</b>                   | Feel painful sensation.                                                 | 32(Off:a3), 35(On:a3), 43(On:a3), 46(On:a3), 50(On:a2)                                         |
|                              | Feels burning and pinching sensation during stimulation.                | 02 (On:a3), 03 (Off:a2)                                                                        |
| <b>VDT</b>                   | The patient experienced a painful sensation that appeared gradually.    | 03 (Off:a3), 27 (Off:a2a3, On:a3)                                                              |
|                              | An intensely painful sensation that appeared unexpectedly.              | 04 (Off:a2a3)                                                                                  |
| <b>DMA</b>                   | Positive test to allodynia (VAS score $\geq 10$ )                       | 03 (Off:a2a3),:08 (Off:On:a3), 17(Off:a3),:18 (Off:a2a3), 32(Off:a3), 33(On:a3),:46(Off:On:a3) |
|                              | The patient was in too much pain to complete the test.                  | 32(Off:a3)                                                                                     |

|                                  |                                                                                |                                                                                                                                 |
|----------------------------------|--------------------------------------------------------------------------------|---------------------------------------------------------------------------------------------------------------------------------|
| <b>PPT<br/>(unpainful phase)</b> | Not applicable                                                                 |                                                                                                                                 |
|                                  | <b>Hyperesthesia</b>                                                           |                                                                                                                                 |
|                                  | <b>Fieldnote</b>                                                               | <b>Patient ID (neurostimulator statut: area tested)</b>                                                                         |
| <b>CDT</b>                       | More sensitive compared to the contralateral area.                             | 04 (Off:a3),:09(Off:a3),:10(On/Off:a3),:18(On:a3), 27(On:a3)                                                                    |
| <b>CPT<br/>(unpainful phase)</b> | None                                                                           |                                                                                                                                 |
| <b>HDT</b>                       | More sensitive compared to the contralateral area.                             | 10(On/Off:a3)                                                                                                                   |
| <b>HPT<br/>(unpainful phase)</b> | None                                                                           |                                                                                                                                 |
| <b>MDT</b>                       | The participant was still able to feel the lowest monofilament force (0.008g). | 49(On:a1)                                                                                                                       |
| <b>VDT</b>                       | None                                                                           |                                                                                                                                 |
| <b>DMA</b>                       | More sensitive compared to the contralateral area.                             | 28(Off:a3), 47(On:a3)                                                                                                           |
| <b>PPT<br/>(unpainful phase)</b> | None                                                                           |                                                                                                                                 |
|                                  | <b>Hypoesthesia</b>                                                            |                                                                                                                                 |
|                                  | <b>Fieldnote</b>                                                               | <b>Patient ID (neurostimulator statut: area tested)</b>                                                                         |
| <b>CDT</b>                       | Less sensitive compared to the contralateral area.                             | 01 (Off:a3), 03 (On:a3), 09(On:a3), 18(Off:a3), 20(Off:a3), 22(Off:a2), 24(On:a3), 32(Off:a3),                                  |
|                                  | The temperature did not decrease gradually.                                    | 21(On:a2a3), 26(Off:a3), 32(Off:a3), 53(On:a2a3),                                                                               |
| <b>CPT<br/>(unpainful phase)</b> | The patient barely felt a cold sensation.                                      | 02 (On:a3)                                                                                                                      |
|                                  | The temperature did not decrease gradually.                                    | 03 (Off:a3), 24(Off:a3), 30(Off:a1a3), 38(On:a3), 43(Off:a3), 46(On:a3), 52(Off:a3, On:a1a2a3), 54(Off:a3), 55(Off:a2a3, On:a3) |
|                                  | Less sensitive compared to the contralateral site.                             | 20(Off:a3), 24(On/Off:a3), 46(Off:a3)                                                                                           |
|                                  | Difficulty to perceive a cold sensation                                        | 53(Off:a2a3)                                                                                                                    |
| <b>HDT</b>                       | Less sensitive compared to the contralateral site.                             | 11 (On/Off:a3), 22(Off:a2), 36(Off:a3)                                                                                          |
|                                  | The temperature did not increase gradually (plateau or stairs).                | 26(On:a3), 30(Off:a1a3, On:a3), 38(On/Off:a2), 42(On:a2), 43(Off:a3)                                                            |

|                                  |                                                                                              |                                                                                                                                                                                             |
|----------------------------------|----------------------------------------------------------------------------------------------|---------------------------------------------------------------------------------------------------------------------------------------------------------------------------------------------|
| <b>HPT<br/>(unpainful phase)</b> | The temperature did not increase gradually                                                   | 02 (On/Off:a3), 03 (OnOff:a2a3), 11(On/Off:a3), 26(Off:On:a2), 30(Off:a1a3, On:a3), 32(On/Off:a2a3), 36(Off:a2a3, On:a3), 43(Off:a3, On:a2a3), 44(Off:a2a3), 52(Off:On:a2a3), 53(On:a1a2a3) |
| <b>MDT</b>                       | Less sensitive compared to the contralateral area                                            | 01 (Off:a3), 05 (On:a3), 18 (On/Off:a2), 28(On/Off:a3), 29(On/Off:a3), 42(On:a3), 46(Off:On:a3), 52(Off:On:a3)                                                                              |
| <b>VDT</b>                       | It took more vibration stimulation to feel the sensation compared to the contralateral area. | 01 (On:a3), 10(Off:a3), 15(On/Off:a3), 17(On/Off:a3), 24(On:a3), 29(Off:a3), 30(Off:a3), 38(On/Off:a2)                                                                                      |
|                                  | The vibration sensation did not increase gradually.                                          | 26(On:a2a3), 35(Off:a2)                                                                                                                                                                     |
| <b>DMA</b>                       | Less sensitive compared to the contralateral site.                                           | 01 (On:a3), 03 (On:a3), 05(On:a3), 10(On:a3), 32(On:a3), 35(Off:a3), 53(On:a3)                                                                                                              |
| <b>PPT<br/>(unpainful phase)</b> | Pressure increased not gradually.                                                            | 15(Off:a3), 32(On/Off:a2a3),                                                                                                                                                                |
| <b>Anesthesia</b>                |                                                                                              |                                                                                                                                                                                             |
|                                  | <b>Fieldnote</b>                                                                             | <b>Patient ID (neurostimulator statut: area tested)</b>                                                                                                                                     |
| <b>CDT</b>                       | No sensation reported.                                                                       | 11 (On/Off:a3),                                                                                                                                                                             |
| <b>CPT<br/>(unpainful phase)</b> | No sensation reported.                                                                       | 02 (Off:a2a3), 11 (On/Off:a3)                                                                                                                                                               |
| <b>HDT</b>                       | No sensation reported.                                                                       | 29(On:a3)                                                                                                                                                                                   |
|                                  | The patient felt the presence of the thermode, but did not feel the heat.                    | 24(On/Off:a2)                                                                                                                                                                               |
| <b>HPT<br/>(unpainful phase)</b> |                                                                                              |                                                                                                                                                                                             |
| <b>MDT</b>                       | No sensation reported.                                                                       | 02 (Off:a3), 11(On:a3)                                                                                                                                                                      |
| <b>VDT</b>                       | No sensation reported.                                                                       | 01(Off:a3), 02 (On:a3), 16(Off:a3), 28(On/Off:a2a3), 29(On:a3), 37(Off:a2a3), 45(Off:a2a3, On:a3), 48(On:a2a3), 50(Off:a2a3, On:a3), 53(On/Off:a2a3)                                        |
| <b>DMA</b>                       | The patient did not feel the movement of the brush on the skin.                              | 01 (Off:a3), 02 (On:a3), 02 (Off:a3), 11(On:a3), 29(Off:a3), 38(On:a3), 43(On/Off:a2a3)                                                                                                     |
| <b>PPT<br/>(unpainful phase)</b> | No sensation reported.                                                                       | 48(On:a2), 02 (Off:a2)                                                                                                                                                                      |
| <b>Dysesthesia</b>               |                                                                                              |                                                                                                                                                                                             |
|                                  | <b>Fieldnote</b>                                                                             | <b>Patient ID (neurostimulator statut: area tested)</b>                                                                                                                                     |

|                              |                                                                   |                                                                            |
|------------------------------|-------------------------------------------------------------------|----------------------------------------------------------------------------|
| <b>CDT</b>                   | The patient felt a burning sensation during the stimulation.      | 05 (Off:a2a3, On:a2),                                                      |
|                              | The patient felt a stinging sensation during the stimulation.     | 08 (Off:a2, On:a3), 18(On::a2a3), 27(On:a3),                               |
| <b>CPT (unpainful phase)</b> | None                                                              |                                                                            |
| <b>HDT</b>                   | Painful pinprick sensation added to the sensation of heat.        | 35(On/Off:a3)                                                              |
|                              | Burning sensation.                                                | 03 (Off:a2a3), 05(Off:a3, On:a3), 10 (On/Off:a3), 28(Off:a3), 44(Off:a2a3) |
|                              | Stinging sensation                                                | 18 (On:a2a3)                                                               |
| <b>HPT (unpainful phase)</b> |                                                                   |                                                                            |
| <b>MDT</b>                   | Muscle spasms.                                                    | 46(On:a3)                                                                  |
|                              | Pinprick sensation                                                | 02(On:a3), 03(Off:a2), 32(Off:a3), 35(On:a3), 43(On:a3), 50(On:a2)         |
| <b>VDT</b>                   | Burning sensation.                                                | 03 (Off:a3)                                                                |
|                              | Électrical shock.                                                 | 04 (Off:a2a3)                                                              |
|                              | Muscle cramp.                                                     | 04 (Off:a3)                                                                |
|                              | muscle spasms.                                                    | 46(Off:a2a3)                                                               |
| <b>DMA</b>                   | The brush generated muscle spasms.                                | 46(Off:a3, On:a2a3)                                                        |
| <b>PPT (unpainful phase)</b> | None                                                              |                                                                            |
| <b>CPT</b>                   | Burning sensation.                                                | 05 (On/Off:a2a3)                                                           |
|                              | Painful sensation that irradiates in the foot                     | 09(Off:a3), 04 (On:a3), 11(On:a3), 26(Off:a3), 27(On/Off:a3)               |
|                              | Electrical Shock.                                                 | 11(Off:a3)                                                                 |
|                              | Painful muscle spasms                                             | 48(On:a2a3), 54(Off:a2)                                                    |
| <b>HPT</b>                   | Painful electrical shock sensation.                               | 08 (On:a3),                                                                |
| <b>PPT</b>                   | Burning sensation                                                 | 03 (Off:a2a3),                                                             |
|                              | Pain radiating in the leg.                                        | 28(Off:a2),                                                                |
|                              | The patient perceived that the stimulus was prolonged/maintained. | 05 (Off:a3),                                                               |
|                              | Painful sensation that radiates in the leg.                       | 27(Off:a3), 43(Off:a3),                                                    |

|                              |                                                                                                  |                                                                                             |
|------------------------------|--------------------------------------------------------------------------------------------------|---------------------------------------------------------------------------------------------|
| <b>Mechanical-TSP</b>        | The number of trials was reduced because the participant reported too much pain after the trial. | 43(Off:a2),                                                                                 |
|                              | Painful muscle spasms                                                                            | 46(On:a2),                                                                                  |
|                              | The number of trials was reduced because the participant reported too much pain after the trial. | 53(Off:a1, On:a2),                                                                          |
| <b>Paresthesia</b>           |                                                                                                  |                                                                                             |
|                              | <b>Fieldnote</b>                                                                                 | <b>Patient ID (neurostimulator statut: area tested)</b>                                     |
| <b>CDT</b>                   | The partient felt a painless tingling sensation during the stimulation.                          | 04 (On:a3),                                                                                 |
|                              | The patient felt a heat sensation instead of cold.                                               | 19 (On:a3)                                                                                  |
|                              | The patient felt a numbness sensation during the stimulation.                                    | 28(Off:a3), 53(Off:a3)                                                                      |
| <b>CPT (unpainful phase)</b> | None                                                                                             |                                                                                             |
| <b>HDT</b>                   | Painless tingling sensation during the stimulation.                                              | 04 (On:a3)                                                                                  |
|                              | Numbess sensation                                                                                | 53(Off:a3), 55(On/Off),                                                                     |
| <b>HPT (unpainful phase)</b> | the patient felt a sensation of heat instead of a sensation of cold.                             | 19 (On:a3)                                                                                  |
| <b>MDT</b>                   | The patient felt a touch sensation when there is no stimulation.                                 | 05 (Off:a1a2a3, On:a3), 09(Off:a2a3), 11(On:a1a2), 43(Off:a2a3), 48(off:a3), 49(Off:a1a2a3) |
|                              | Cold sensation                                                                                   | 50(On:a1)                                                                                   |
|                              | The patient perceived that the stimulus was prolonged/maintained.                                | 10 (Off:On:a3)                                                                              |
| <b>VDT</b>                   | Felt heat.                                                                                       | 33(Off:a2a3), 53(Off:a3)                                                                    |
|                              | The patient perceived that the stimulus was prolonged/maintained.                                | 27(Off:a2)                                                                                  |
| <b>DMA</b>                   | Water flow sensation                                                                             | 16 (On/Off:a3)                                                                              |
|                              | Not painful, but unpleasant sensation                                                            | 18(On:a3), 50(On/Off:a1a2a3)                                                                |
|                              | Numbness sensation.                                                                              | 26(Off:a3)                                                                                  |

|                              |                                                                                                          |                                                                                                                                                                                                                                                                                                                                                                                                                                                                                                                                                                                                                                                                                                                                                                                                                                                                                                                                                                                                                                                                                                      |
|------------------------------|----------------------------------------------------------------------------------------------------------|------------------------------------------------------------------------------------------------------------------------------------------------------------------------------------------------------------------------------------------------------------------------------------------------------------------------------------------------------------------------------------------------------------------------------------------------------------------------------------------------------------------------------------------------------------------------------------------------------------------------------------------------------------------------------------------------------------------------------------------------------------------------------------------------------------------------------------------------------------------------------------------------------------------------------------------------------------------------------------------------------------------------------------------------------------------------------------------------------|
|                              | The patient felt two stimulation while the brush touched the skin only one time.                         | 32(:Off:a2)                                                                                                                                                                                                                                                                                                                                                                                                                                                                                                                                                                                                                                                                                                                                                                                                                                                                                                                                                                                                                                                                                          |
| <b>PPT (unpainful phase)</b> | None                                                                                                     |                                                                                                                                                                                                                                                                                                                                                                                                                                                                                                                                                                                                                                                                                                                                                                                                                                                                                                                                                                                                                                                                                                      |
| <b>CPT</b>                   | Painless tingling sensation                                                                              | 04 (On:a3), 09(Off:a3), 08 (On:a3),:32(On:a2)                                                                                                                                                                                                                                                                                                                                                                                                                                                                                                                                                                                                                                                                                                                                                                                                                                                                                                                                                                                                                                                        |
|                              | Heat sensation                                                                                           | 33(On:a2a3)                                                                                                                                                                                                                                                                                                                                                                                                                                                                                                                                                                                                                                                                                                                                                                                                                                                                                                                                                                                                                                                                                          |
| <b>HPT</b>                   | Painless tingling sensation that irradiates in the foot.                                                 | 04 (On:a3)                                                                                                                                                                                                                                                                                                                                                                                                                                                                                                                                                                                                                                                                                                                                                                                                                                                                                                                                                                                                                                                                                           |
|                              | Tingling sensation.                                                                                      | 09(Off:a3), 09(On:a3)                                                                                                                                                                                                                                                                                                                                                                                                                                                                                                                                                                                                                                                                                                                                                                                                                                                                                                                                                                                                                                                                                |
|                              | Sensation that heat is spreading like an ink spot.                                                       | 10 (On:a3),                                                                                                                                                                                                                                                                                                                                                                                                                                                                                                                                                                                                                                                                                                                                                                                                                                                                                                                                                                                                                                                                                          |
|                              | Incorfortable sensation that irradiates in the foot                                                      | 27(Off:a2a3, On:a3),                                                                                                                                                                                                                                                                                                                                                                                                                                                                                                                                                                                                                                                                                                                                                                                                                                                                                                                                                                                                                                                                                 |
|                              | The participant reported an unpainful abnormal sensation in a different area than the one tested         | 04 (On:a3), 27(Off:a2a3, On:a3),                                                                                                                                                                                                                                                                                                                                                                                                                                                                                                                                                                                                                                                                                                                                                                                                                                                                                                                                                                                                                                                                     |
|                              |                                                                                                          |                                                                                                                                                                                                                                                                                                                                                                                                                                                                                                                                                                                                                                                                                                                                                                                                                                                                                                                                                                                                                                                                                                      |
| <b>PPT</b>                   | Painless tingling sensation that irradiates in the foot.                                                 | 04 (Off:a3)                                                                                                                                                                                                                                                                                                                                                                                                                                                                                                                                                                                                                                                                                                                                                                                                                                                                                                                                                                                                                                                                                          |
|                              | Numbness sensation.                                                                                      | 27 (On:a3),                                                                                                                                                                                                                                                                                                                                                                                                                                                                                                                                                                                                                                                                                                                                                                                                                                                                                                                                                                                                                                                                                          |
|                              | The participant reported an unpainful abnormal sensation in a different area than the one tested         | 04 (Off:a3)                                                                                                                                                                                                                                                                                                                                                                                                                                                                                                                                                                                                                                                                                                                                                                                                                                                                                                                                                                                                                                                                                          |
| <b>Mechanical-TSP</b>        | The patient felt an unpleasent painless sensation                                                        | 54(On:a2),                                                                                                                                                                                                                                                                                                                                                                                                                                                                                                                                                                                                                                                                                                                                                                                                                                                                                                                                                                                                                                                                                           |
|                              | <b>Analgesia</b>                                                                                         |                                                                                                                                                                                                                                                                                                                                                                                                                                                                                                                                                                                                                                                                                                                                                                                                                                                                                                                                                                                                                                                                                                      |
|                              | <b>Fieldnote</b>                                                                                         | <b>Patient ID (neurostimulator statut: area tested)</b>                                                                                                                                                                                                                                                                                                                                                                                                                                                                                                                                                                                                                                                                                                                                                                                                                                                                                                                                                                                                                                              |
| <b>CPT</b>                   | No painful sensation reported.                                                                           | 01(Off:a3), 02(Off:a2a3), 11(On:a3), 15(Off:a3), 16(Off/On:a1a2a3), 20(Off/On:a1a2a3), 24(Off/On:a1a2a3), 28(Off/On:a2a3), 29(On:a3), 30(On:a1a3), 31(Off/On:a1a2a3), 33(On:a2), 36(On:a3), 37(Off:a3), 39(On:a2a3), 42(Off:a1a3), 43(Off/On:a3), 44(Off/On:a1a2a3), 45(Off/On:a2), 46(Off:a1a3, On:a1a2a3), 47(Off/On:a1a2a3), 48(Off:a2a3), 49(On:a2a3), 50(Off:a2a3), 51(Off:a1a3), 52(Off:a2a3), 53(Off:a2a3), 54(Off:a2a3), 55(Off:a2a3), 56(Off:a2a3), 57(Off:a2a3), 58(Off:a2a3), 59(Off:a2a3), 60(Off:a2a3), 61(Off:a2a3), 62(Off:a2a3), 63(Off:a2a3), 64(Off:a2a3), 65(Off:a2a3), 66(Off:a2a3), 67(Off:a2a3), 68(Off:a2a3), 69(Off:a2a3), 70(Off:a2a3), 71(Off:a2a3), 72(Off:a2a3), 73(Off:a2a3), 74(Off:a2a3), 75(Off:a2a3), 76(Off:a2a3), 77(Off:a2a3), 78(Off:a2a3), 79(Off:a2a3), 80(Off:a2a3), 81(Off:a2a3), 82(Off:a2a3), 83(Off:a2a3), 84(Off:a2a3), 85(Off:a2a3), 86(Off:a2a3), 87(Off:a2a3), 88(Off:a2a3), 89(Off:a2a3), 90(Off:a2a3), 91(Off:a2a3), 92(Off:a2a3), 93(Off:a2a3), 94(Off:a2a3), 95(Off:a2a3), 96(Off:a2a3), 97(Off:a2a3), 98(Off:a2a3), 99(Off:a2a3), 100(Off:a2a3) |
|                              | The patient felt a cold sensation, but I did not feel pain. "I am not able to detect painful sensation." | 02 (On:a2a3),:10(On/Off:a1a2a3)                                                                                                                                                                                                                                                                                                                                                                                                                                                                                                                                                                                                                                                                                                                                                                                                                                                                                                                                                                                                                                                                      |
| <b>HPT</b>                   | No painful sensation reported.                                                                           | 01 (Off:a3), 19(On:a3), 28(Off:a3, On:a1), 29(Off:a3), 46(Off:a3, On:a1a3), 47(Of::a1), 49(On:a3), 52(Off:a1),                                                                                                                                                                                                                                                                                                                                                                                                                                                                                                                                                                                                                                                                                                                                                                                                                                                                                                                                                                                       |

|                       |                                                                                                  |                                                                                                                                                                                                                                                                                                                                                                                                  |
|-----------------------|--------------------------------------------------------------------------------------------------|--------------------------------------------------------------------------------------------------------------------------------------------------------------------------------------------------------------------------------------------------------------------------------------------------------------------------------------------------------------------------------------------------|
| <b>PPT</b>            | No painful sensation reported.                                                                   | 24(Off:a2, On:a2a3), 39(Off/On:a2a3), 47(On:a2), 52(On:a3)                                                                                                                                                                                                                                                                                                                                       |
| <b>Mechanical-TSP</b> | No painful sensation reported.                                                                   | 01(Off:a3), 02(On:a3), 20(Off/On:a1a2a3), 24(Off:a3, On:a2), 28(Off/On:a1), 29(Off/On:a3), 30(On:a1a2a3), 31(Off/On:a1), 32(Off/On:a1a2, On:a3), 33(Off:a1, On:a1a2), 38(On:a1), 40(On:a3), 42(Off/On:a1a2a3), 46(Off:a1a2a3, On:a1), 47(Off/On:a1a2a3), 48(Off/On:a1a2a3), 49(On:a1), 50(Off:a1a2a3, On:a1a3), 51(Off/On:a1a2a3), 52(Off/On:a1a2a3), 53(Off/On:a1a2a3), 43(Off:a1a2, On:a1a2a3) |
|                       | The pateint reported to feel the neuropen just a little bit.                                     |                                                                                                                                                                                                                                                                                                                                                                                                  |
|                       | The patient did not feel the sensation of neuropen movement.                                     | 11(On:a3),                                                                                                                                                                                                                                                                                                                                                                                       |
| <b>Hyperalgesia</b>   |                                                                                                  |                                                                                                                                                                                                                                                                                                                                                                                                  |
| <b>Fieldnote</b>      |                                                                                                  | <b>Patient ID (neurostimulator statut: area tested)</b>                                                                                                                                                                                                                                                                                                                                          |
| <b>CPT</b>            | When compared to the contralateral site, the painful sensation is more intense.                  | 01 (On:a3), 03 (On:a3), 09(Off:a3), 47(On:a3)                                                                                                                                                                                                                                                                                                                                                    |
|                       | Painful cold sensation appeared suddenly and intensely.                                          | 03 (Off:a3), 10 (On/Off:a3), 35(On:a3), 48(Off:a1), 55(On:a1a2)                                                                                                                                                                                                                                                                                                                                  |
|                       | Pain sensation appeared intensely.                                                               | 05 (On/Off:a2a3),:18 (On/Off:a2a3)                                                                                                                                                                                                                                                                                                                                                               |
|                       | Too painful to complete the test.                                                                | 08 (On:a3)                                                                                                                                                                                                                                                                                                                                                                                       |
| <b>HPT</b>            | Painful sensation more intense compared with the contralateral site.                             | 01 (On:a3), 04 (Off:a3), 10(Off:a3),                                                                                                                                                                                                                                                                                                                                                             |
|                       | Pain heat sensation appeared suddenly and intensely.                                             | 02 (On/Off:a3), 03 (On:a2a3), 11(On/Off:a3), 26(Off:a3), 44(Off:a2a3),                                                                                                                                                                                                                                                                                                                           |
|                       | Burning sensation appeared intensely.                                                            | 05 (On/Off:a2a3),:08 (On:a3), 43(Off:a3),                                                                                                                                                                                                                                                                                                                                                        |
|                       | Too painful to complete the test.                                                                | 08 (On/Off:a3), 22(Off:On:a2a3),                                                                                                                                                                                                                                                                                                                                                                 |
|                       | Intense painful sensation compared to the other area tested.                                     | 09(On:a3), 18 (Off:a2a1, Ona3), 45(Off:a3), 49(Off:a3),                                                                                                                                                                                                                                                                                                                                          |
|                       | The number of trials was reduced because the participant reported too much pain after the trial. | 22(Off:On:a2a3),                                                                                                                                                                                                                                                                                                                                                                                 |

|                       |                                                                                                  |                                                                    |
|-----------------------|--------------------------------------------------------------------------------------------------|--------------------------------------------------------------------|
| <b>PPT</b>            | Painful sensation more intense compared with the contralateral site.                             | 03 (On:a3), 05(Off:Ona3), 18(Ona3), 20(On:a3), 48(Off:a2),         |
|                       | Painful sensation appears suddenly and intensely.                                                | 04 (Off:a2a3), 15(Off:a3), 32(On/Off:a2a3), 37(Off:a3), 47(On:a3), |
|                       | Too painful to finish the test.                                                                  | 17(Off:a3),                                                        |
| <b>Mechanical-TSP</b> | Intense painful sensation compared to the ipsilateral site.                                      | 04 (Off:a2a3),                                                     |
|                       | The patient reported a painful sensation more intense compared to the contralateral site.        | 04 (On:a3), 09(On/Off:a3), 10(On/Off:a3), 18(Ona3),                |
|                       | Too painful to complete the test.                                                                | 08 (Off:On:a3), 17(Off:a3), 33(On:a3, Off:a2a3), 46(On:a3),        |
|                       | The number of trials was reduced because the participant reported too much pain after the trial. | 27(Off:On:a2a3), 32(Off:a3), 33(On/Off:a3), 46(On:a2a3),           |
| <b>Hypoalgesia</b>    |                                                                                                  |                                                                    |
| <b>Fieldnote</b>      |                                                                                                  | <b>Patient ID (neurostimulator statut: area tested)</b>            |
| <b>CPT</b>            | It takes more stimulation to feel a painful sensation compared to the contralateral site.        | 15(On:a3), 37(On:a3)                                               |
| <b>HPT</b>            | None                                                                                             |                                                                    |
| <b>PPT</b>            | None                                                                                             |                                                                    |
| <b>Mechanical-TSP</b> | None                                                                                             |                                                                    |
